# Supplementary material for: The lipoprotein-associated phospholipase A2 inhibitor Darapladib sensitises cancer cells to ferroptosis by remodelling lipid metabolism
Source: PubMed Central journal article supplement (PMC10504358; doi:10.1038/s41467-023-41462-9), 2023-09-15

## Supplementary Information

### **DarapladiB, a lipoprotein-associated phospholipase A2 inhibitor, sensitises cancer cells to ferroptosis by remodelling lipid metabolism**

Mihee Oh, Seo Young Jang, Ji-Yoon Lee, Jong Woo Kim, Youngae Jung, Jiwoo Kim, Jinho Seo, Tae-Su Han, Eunji Jang, Hye Young Son, Dain Kim, Min Wook Kim, Jin-Sung Park, Kwon-Ho Song, Kyoung-Jin Oh, Won Kon Kim, Kwang-Hee Bae, Yong-Min Huh, Soon Ha Kim, Doyoun Kim, Baek-Soo Han, Sang Chul Lee, Geum-Sook Hwang, Eun-Woo Lee

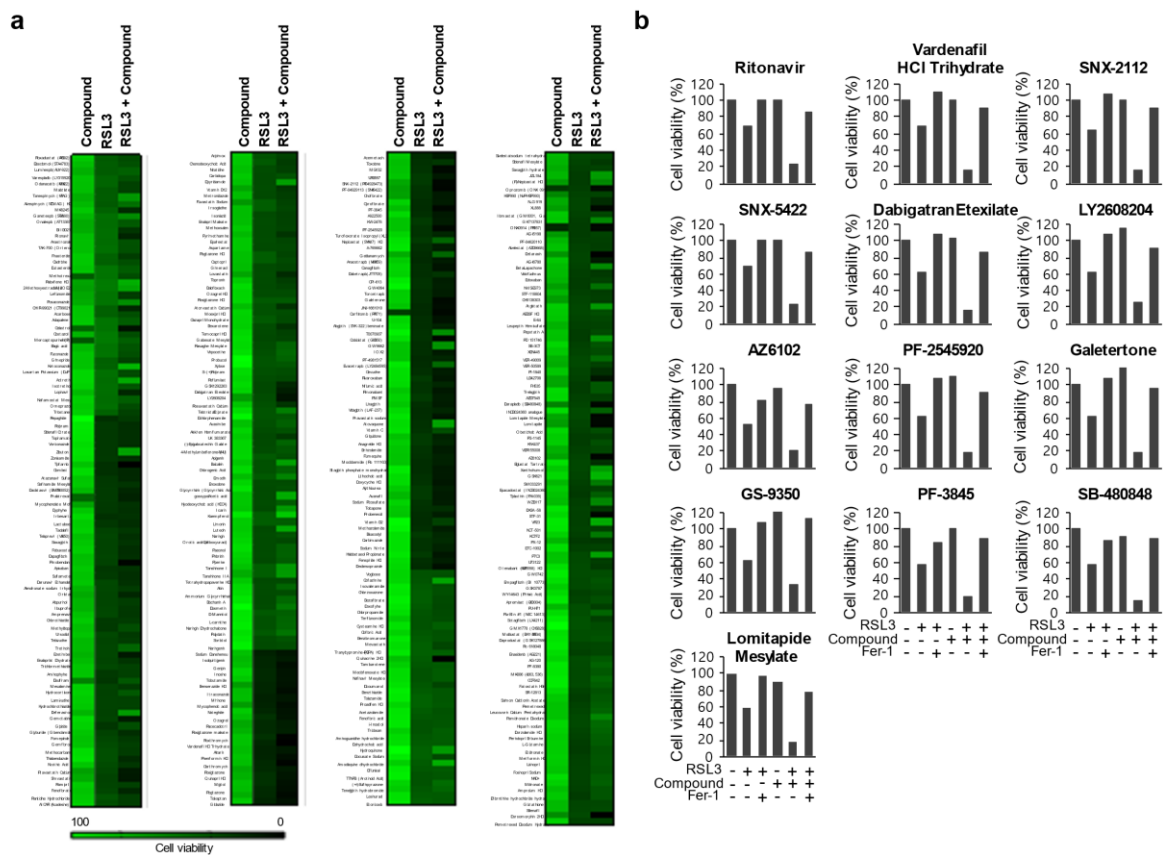

**Supplementary Fig. 1. Identification of ferroptosis-modulating compounds by metabolic library screening.**

(a) Heatmap data indicating the viability of cells treated with the compounds at 10  $\mu$ M alone or in combination with 0.5  $\mu$ M RSL3. (b) Representative compounds that promote RSL3-induced ferroptosis in Hs746T cells.



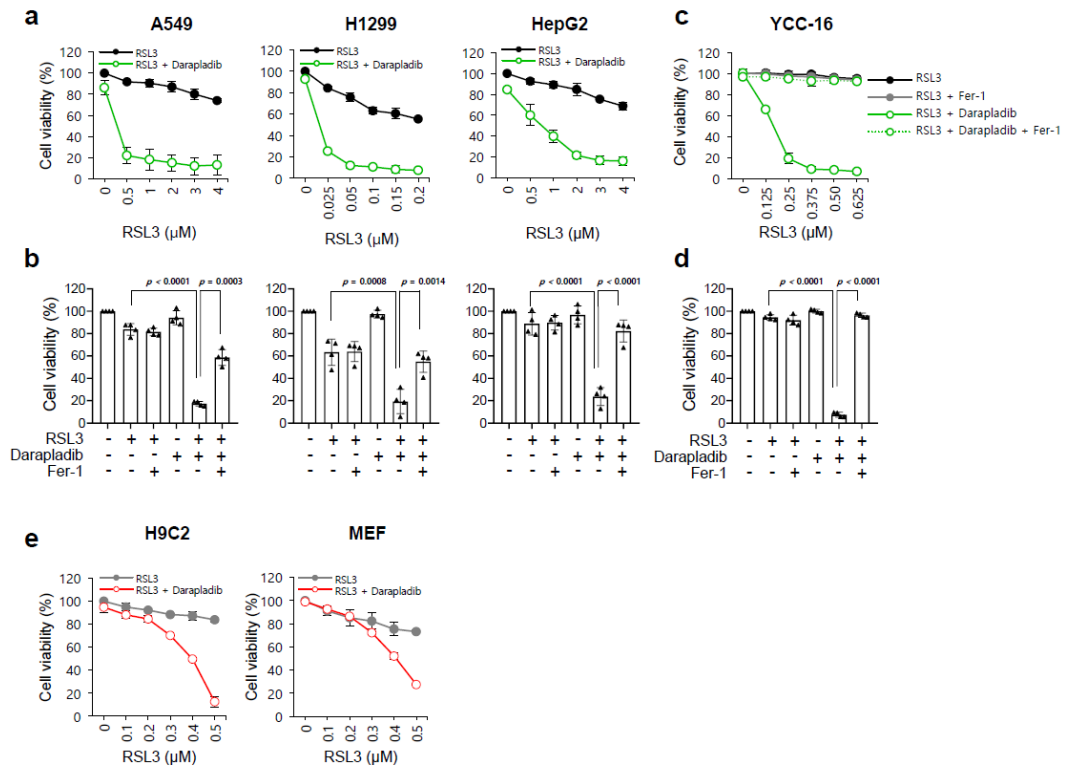

### Supplementary Fig. 3. Darapladib sensitises various types of cancer cells to ferroptosis.

(a, b) Relative viability of A549, H1299, and HepG2 cells treated with RSL3 and/or 2  $\mu\text{M}$  darapladib in the presence or absence of Fer-1 for 20 h. The data are presented as the means  $\pm$  SDs ( $n = 3$  or 4 independent experiments, the significance of the results was assessed using a two-tailed Student'  $t$  test). (c, d) Relative viability of YCC-16 cells treated with RSL3 and/or 2  $\mu\text{M}$  darapladib in the presence or absence of Fer-1 for 20 h. The data are presented as the means  $\pm$  SDs ( $n = 4$  independent experiments, the significance of the results was assessed using a two-tailed Student'  $t$  test). (e) Relative viability of H9c2 and MEF cells treated with RSL3 and/or 2  $\mu\text{M}$  darapladib. The data are presented as the means  $\pm$  SDs ( $n = 3$  independent experiments). Exact p values provided as source data. Source data are provided as a source data file.

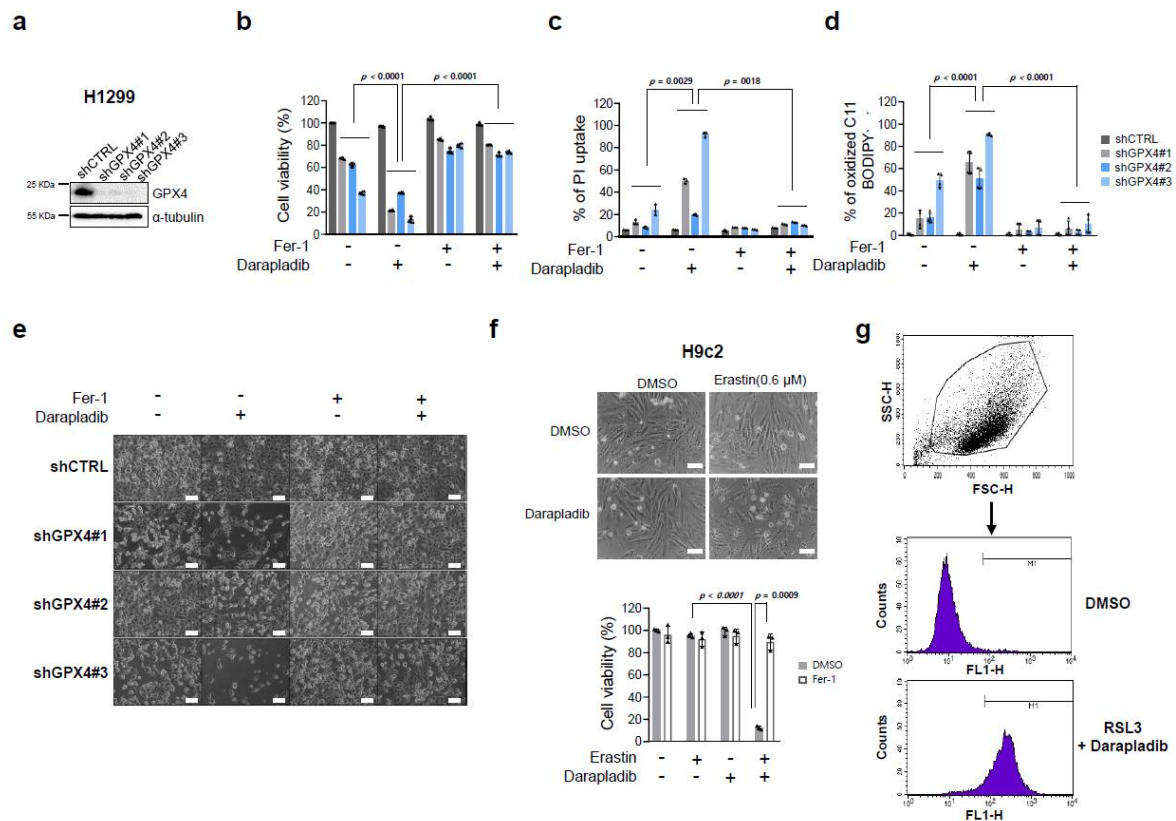

#### Supplementary Fig. 4. Darapladib augments ferroptosis induced by GPX4 depletion or erastin.

(a) Western blot analysis showing the levels of GPX4 protein in three independent H1299 cells stably transfected with shRNA against GPX4. This experiment was repeated three times. (b-d) Relative cell viability, PI uptake, and lipid peroxidation levels of GPX4-depleted H1299 cells treated with 5 μM darapladib in the presence or absence of 2 μM Fer-1 for 20 h. The data are presented as the means ± SDs (b: n = 8, c: n = 3, d: n = 4 independent experiments, the significance of the results was assessed using a two-tailed Student' *t* test). (e) Images of GPX4-depleted cells treated with 5 μM darapladib and/or 2 μM Fer-1. This experiment was repeated three times. Scale bar, 200 μm. (f) Relative viability of H9c2 cells treated with erastin and/or 2 μM darapladib in the presence or absence of Fer-1 for 20 h. The data are presented as the means ± SDs (n = 3 independent experiments, the significance of the results was assessed using a two-tailed Student' *t* test). Scale bar, 200 μm. (g) Example gating strategy for flow cytometry analysis of BODIPY-C11 581/591 oxidation in cells. Exact p values provided as source data. Source data are provided as a source data file.

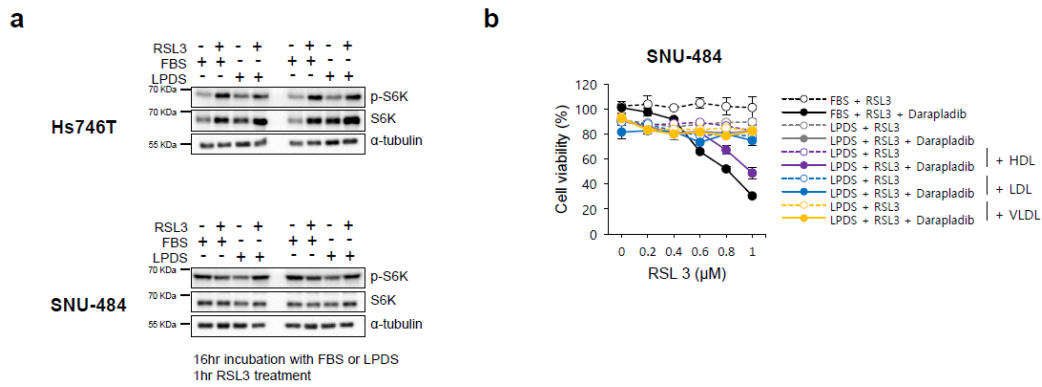

**Supplementary Fig. 5. Lipoprotein deficiency delays ferroptosis, possibly due to lack of HDL.**

(a) Western blot analysis of p-S6K and S6K to determine whether lipoprotein deficiency affects the mTOR pathway in Hs746T and SNU-484 cells. This experiment was repeated three times. (b) Relative viability of SNU-484 cells cultured in lipoprotein-deficient serum supplemented with HDL, LDL, or VLDL and then treated with RSL3 and 2  $\mu$ M darapladib for 6 h. The data are presented as the means  $\pm$  SDs (n = 4 independent experiments). Source data are provided as a source data file.

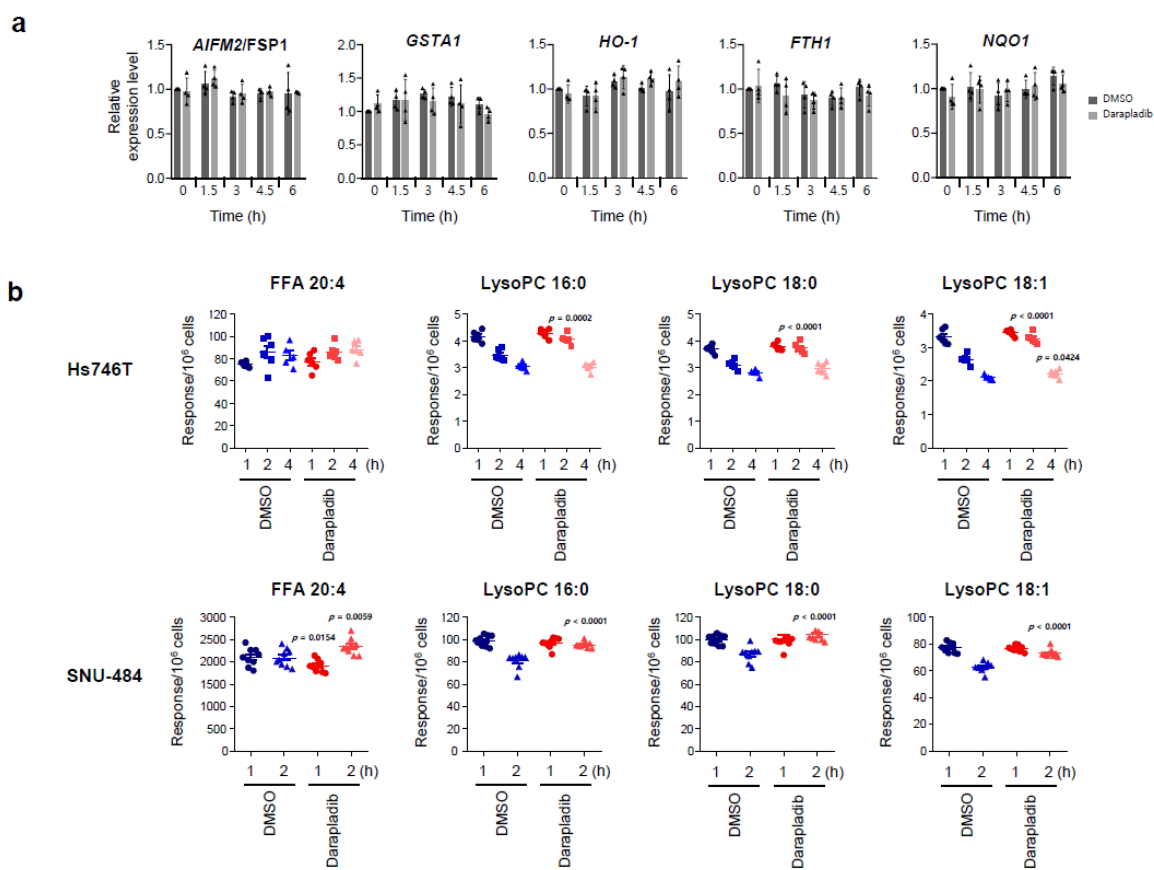

**Supplementary Fig. 6. Lp-PLA2 does not contribute to the NRF2 pathway or the extracellular levels of lysoPCs.**

(a) Darapladib does not alter NRF2 activity. The mRNA expression levels of NRF2 targets, such as *AIFM2/FSP1*, *GSTA1*, *HO-1*, *Fth1* and *Nqo1*, in Hs746T cells treated with darapladib were analysed. The data are presented as the means  $\pm$  SDs ( $n = 4$  independent experiments). (b) Levels of AA and lysoPC species in the conditioned medium of Hs746T cells treated with 2  $\mu$ M darapladib for 0.5, 1, 2, and 4 h determined using LC–MS/MS. The levels of lipids were normalised by the internal standard and cell numbers. The data are presented as the means  $\pm$  SDs (Hs746T :  $n = 6$ , SNU-484 :  $n = 9$  independent experiments, the significance of the results was assessed using two-tailed Student' *t* test). Exact *p* values provided as source data. Source data are provided as a source data file.

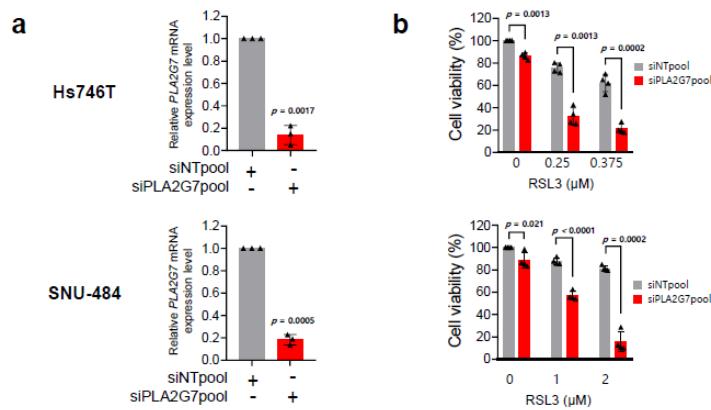

**Supplementary Fig. 7. Knockdown of Lp-PLA2 augments RSL3-induced ferroptosis.**

(a) Analysis of *PLA2G7* mRNA expression in Hs746T and SNU-484 cells 72 h after siRNA transfection. The data are presented as the means  $\pm$  SDs (n = 3 independent experiments, the significance of the results was assessed using a two-tailed Student' *t* test). (b) Relative viability of Hs746T and SNU-484 cells treated with RSL3 72 h after siRNA transfection. The relative expression levels were normalised to the  $\beta$ -actin expression levels. The data are presented as the means  $\pm$  SDs (n = 4 independent experiments, the significance of the results was assessed using a two-tailed Student' *t* test). Exact p values provided as source data. Source data are provided as a source data file.



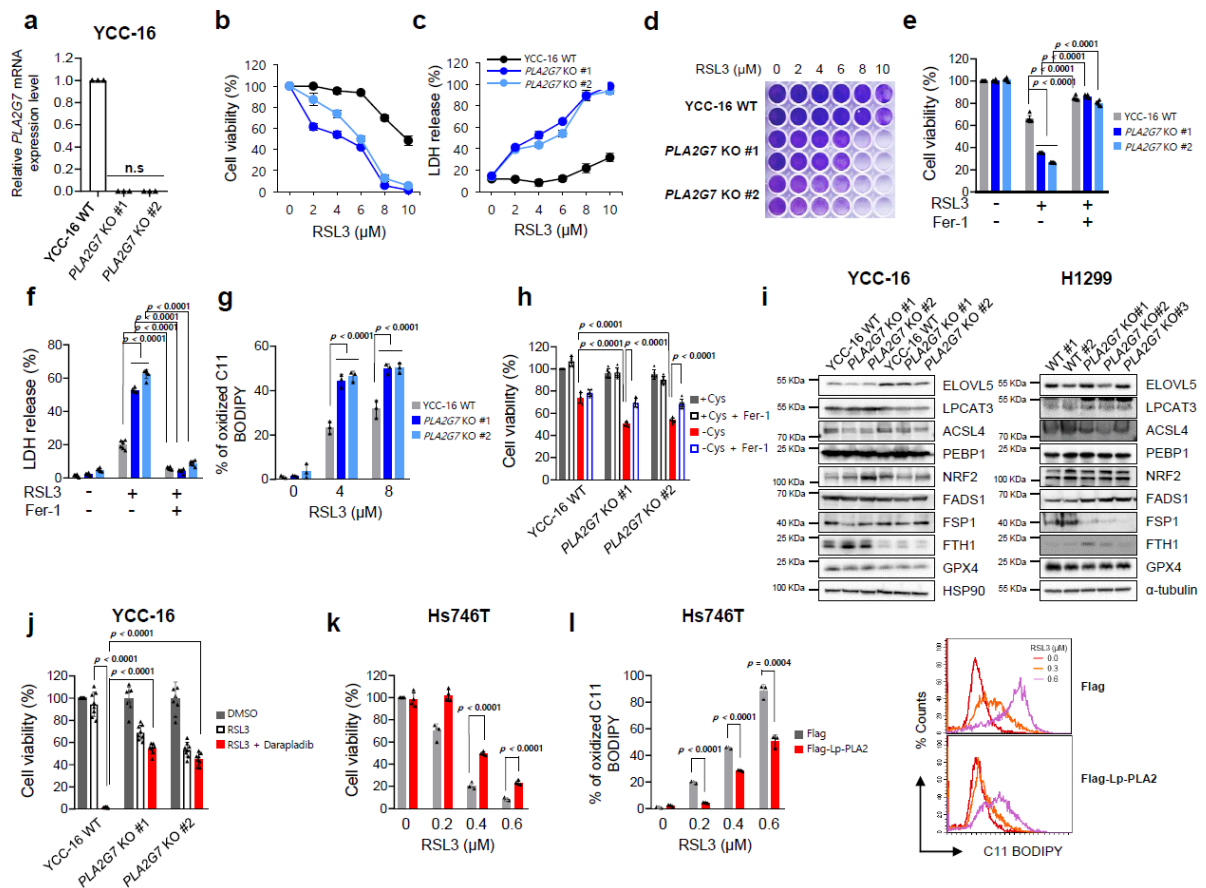

**Supplementary Fig. 8. Lp-PLA2 negatively regulates lipid peroxidation and ferroptosis.**

(a) Analysis of mRNA expression of *PLA2G7* in *PLA2G7* KO YCC-16 cells normalised to the  $\beta$ -actin expression levels. (n = 3 independent experiments, the significance of the results was assessed using a two-tailed Student' *t* test). (b, c) Relative cell viability and LDH levels of WT and *PLA2G7* KO YCC-16 cells treated with RSL3 for 72 h. The data are presented as the means  $\pm$  SDs (n = 4 independent experiments). (d) Crystal violet staining of cells treated with increasing concentrations of RSL3. (e, f) Relative cell viability and LDH levels of WT and *PLA2G7* KO YCC-16 cells treated with RSL3 in the presence or absence of Fer-1 for 72 h. The data are presented as the means  $\pm$  SDs (n = 6 independent experiments, the significance of the results was assessed using a two-tailed Student' *t* test). (g) Lipid peroxidation level of WT and Lp-PLA2 KO YCC-16 cells treated with RSL3 for 2 h. The data are presented as the means  $\pm$  SDs (n = 3 independent experiments the significance of the results was assessed using a two-tailed Student' *t* test). (h) Viability of WT and Lp-PLA2 KO YCC-16 cells cultured in cysteine-deficient medium for 48 h. The data are presented as the means  $\pm$  SDs (n = 6 independent experiments, the significance of the results was assessed using a two-tailed Student' *t* test). (i) Western blots

showing the protein expression levels of ferroptosis-related genes in WT and *PLA2G7* KO cells. (j) Relative cell viability of WT and *PLA2G7* KO YCC-16 cells treated with RSL3 and/or darapladib for 48 h. The data are presented as the means  $\pm$  SDs (n = 8 independent experiments, the significance of the results was assessed using a two-tailed Student' *t* test). (k, l) Relative viability and lipid peroxidation levels of WT and *PLA2G7* KO cells ectopically expressing Lp-PLA2 and treated with RSL3. The data are presented as the means  $\pm$  SDs (k: n = 4, l: n = 3 independent experiments, the significance of the results was assessed using a two-tailed Student' *t* test). Exact p values provided as source data. Source data are provided as a source data file.

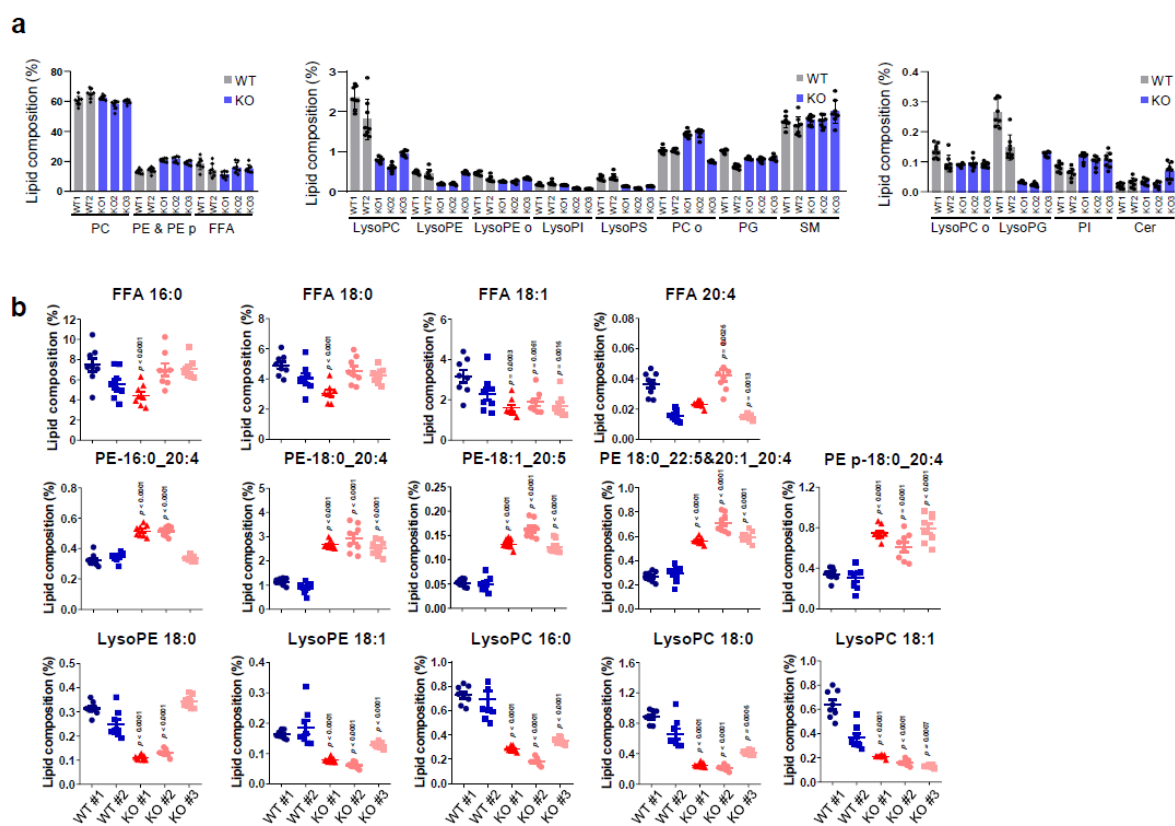

**Supplementary Fig. 9. *PLA2G7* deficiency results in the accumulation of PE and PE-p species and the depletion of lysoPE species.**

(a) Proportions of various lipid classes normalised by the total lipids detected by LC–MS/MS in WT and *PLA2G7* KO H1299 cells. The y-axis indicates the percentage of the lipid class. The data are presented as the means  $\pm$  SDs ( $n = 8$  independent experiments). (b) Relative lipid composition of the representative lipid species. The data are presented as the means  $\pm$  SDs ( $n = 8$  independent experiments with, the significance of the results was assessed using one-sided Wilcoxon rank-sum test). Exact p values provided as source data. Source data are provided as a source data file.

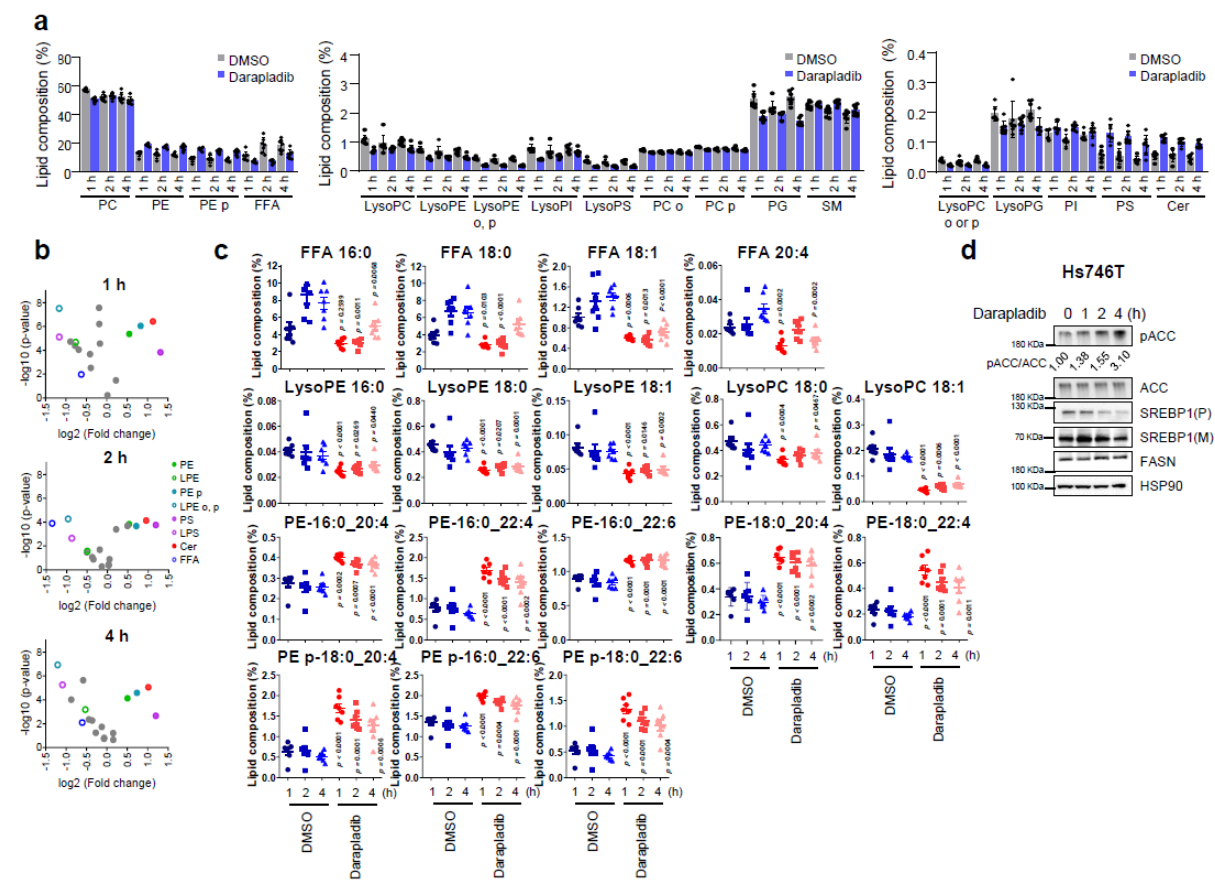

**Supplementary Fig. 10. Darapladiib induces the accumulation of PE and PE-p species and decreases in lysoPE and MUFA species.**

(a) Proportions of various lipid classes normalised by the total lipids detected by LC–MS/MS in Hs746T cells treated with darapladiib. The y-axis indicates the percentage of the lipid class. The data are presented as the means  $\pm$  SDs ( $n = 7$  independent experiments). (b) Volcano plot of lipid classes showing the  $\log_2(\text{fold change})$  and  $-\log_{10}(p)$  values in the control vs. darapladiib-treated Hs746T cells. (c) Levels of representative lipid species in Hs746T cells treated with darapladiib for 1, 2, and 4 h were detected by LC–MS/MS. The data are presented as the means  $\pm$  SDs ( $n = 7$  independent experiments with, the significance of the results was assessed using a two-tailed Student'  $t$  test). (d) Darapladiib downregulates the expression of genes involved in de novo fatty acid synthesis. Western blots showing the expression levels of well-known fatty acid metabolism-related genes, such as FASN, ACC, ACC-p, PPAR gamma, and SREBP1, after treatment with darapladiib for the indicated times. This experiment was repeated three times. FFA: free fatty acid, Cer: ceramide, SM: sphingomyelin, lysoPC: lysophosphatidylcholine, lysoPE: lysophosphatidylethanolamine, lysoPG: lysophosphatidylglycerol, lysoPI: lysophosphatidylinositol, lysoPS: lysophosphatidylserine, PC: phosphatidylcholine, PE:

phosphatidylethanolamine, PG: phosphatidylglycerol, PI: phosphatidylinositol, PS: phosphatidylserine. Exact p values provided as source data. Source data are provided as a source data file.

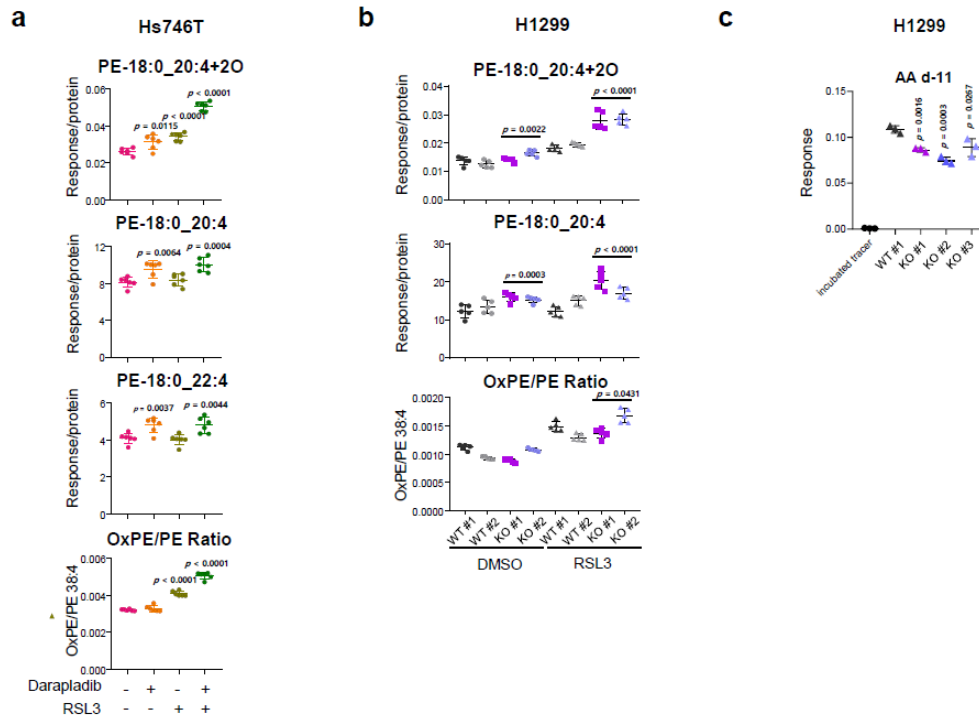

**Supplementary Fig. 11. Lp-PLA2 controls both non-oxidised and oxidised PE-18:0/20:4 (SAPE).**

(a) Relative levels of oxidised PE-18:0/20:4, PE-18:0\_20:4, and PE-18:0\_22:4 in Hs746T cells treated with RSL3 and/or 2  $\mu$ M darapladib. The ratios of oxidised to non-oxidised PE-18:0\_20:4 are also shown. The levels of lipids were determined by LC-MS/MS and normalised to the internal standard and cellular protein levels. The data are presented as the means  $\pm$  SDs ( $n = 6$  independent experiments, the significance of the results was assessed using a two-tailed Student'  $t$  test). (b) Relative levels of oxidised and non-oxidised PE-18:0\_20:4 and their ratio in WT and *PLA2G7* KO H1299 cells treated with RSL3 for 4 h. The data are presented as the means  $\pm$  SDs ( $n = 5$  independent experiments with, the significance of the results was assessed using one-sided Wilcoxon rank-sum test). (c) Analysis of AA-d11 cleavage by PE-18:0\_20:4-d11 using lysates from WT and *PLA2G7* KO cells. The data are presented as the means  $\pm$  SDs ( $n = 3$  independent experiments, the significance of the results was assessed using a two-tailed Student'  $t$  test). Exact p values provided as source data. Source data are provided as a source data file.

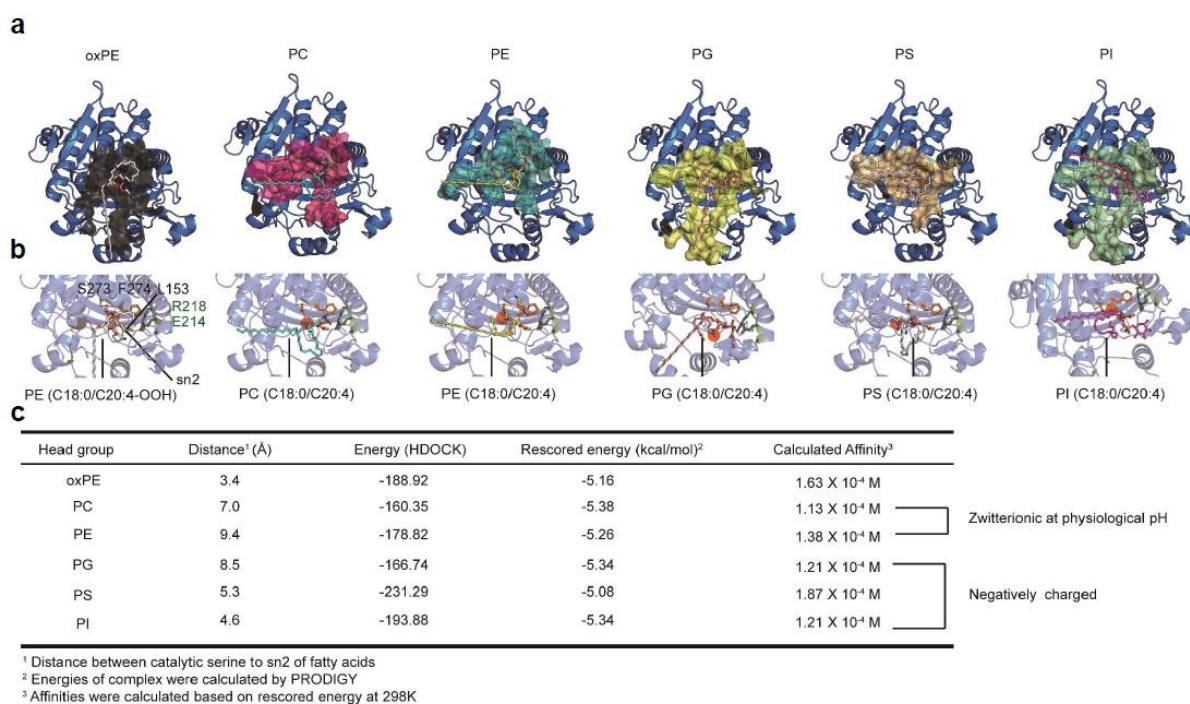

**Supplementary Fig. 12. Molecular docking analysis of Lp-PLA2 and various phospholipids.**

(a) The cartoon representation of the structural docking model of Lp-PLA2 in complex with various phospholipids with different head groups: PC, PE, PS, PI, and PG. The residues involved in interaction in models were represented by surface. The lipid molecules are represented with a ball-and-stick model. The nitrogen and oxygen atoms of lipid molecules are coloured blue and red, respectively. (b) The zoomed view of binding interface between Lp-PLA2 and various phospholipids were represented. The residues involve in known catalysis were coloured red and represented ball and stick model. The residues involved in typical head group interaction were coloured green. (c) Calculated binding affinity between Lp-PLA2 and different phospholipids.

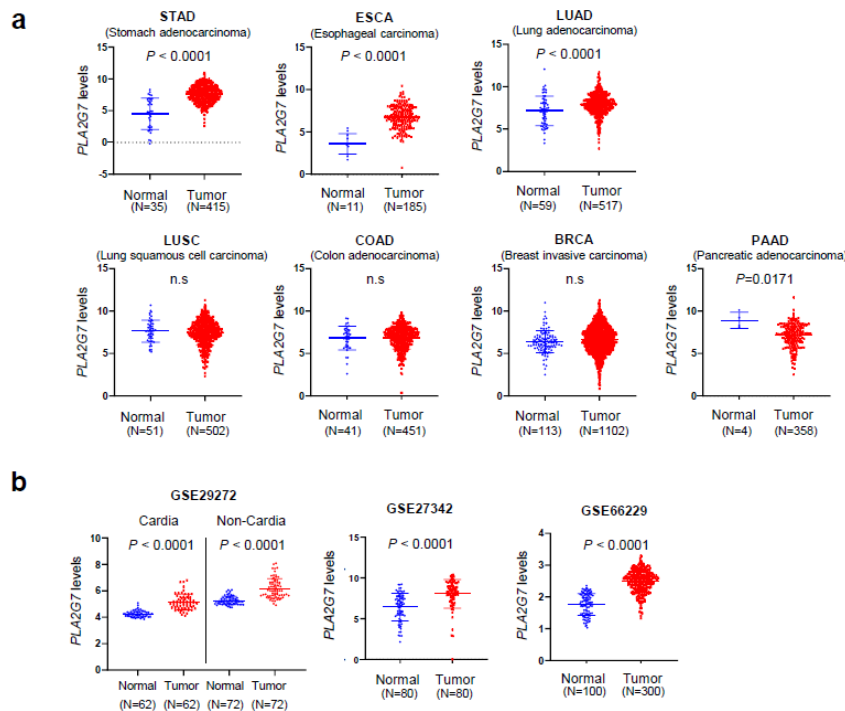

**Supplementary Fig. 13. Expression of *PLA2G7* in several types of tumours and normal tissues from transcriptome datasets.**

(a) Upregulation of *PLA2G7* in several cancer types, including gastric cancer. Expression of *PLA2G7* in stomach adenocarcinoma (STAD,  $n_{\text{normal}}=35$ ,  $n_{\text{tumor}}=415$ ), oesophageal carcinoma (ESCA,  $n_{\text{normal}}=11$ ,  $n_{\text{tumor}}=185$ ), lung adenocarcinoma (LUAD,  $n_{\text{normal}}=59$ ,  $n_{\text{tumor}}=517$ ), lung squamous cell carcinoma (LUSC,  $n_{\text{normal}}=51$ ,  $n_{\text{tumor}}=502$ ), colon adenocarcinoma (COAD,  $n_{\text{normal}}=41$ ,  $n_{\text{tumor}}=451$ ), breast invasive carcinoma (BRCA,  $n_{\text{normal}}=113$ ,  $n_{\text{tumor}}=1102$ ) and pancreatic adenocarcinoma (PAAD,  $n_{\text{normal}}=4$ ,  $n_{\text{tumor}}=358$ ) tissues and their matched normal tissues. The expression data were extracted from the TCGA repository. (b) Relative expression levels of *PLA2G7* in gastric cancer and normal tissues from independent transcriptome datasets (GSE66229: Cardia  $n_{\text{normal}}=62$ ,  $n_{\text{tumor}}=62$ , Non-cardia  $n_{\text{normal}}=72$ ,  $n_{\text{tumor}}=72$ , GSE29272  $n_{\text{normal}}=80$ ,  $n_{\text{tumor}}=80$ , and GSE27342  $n_{\text{normal}}=100$ ,  $n_{\text{tumor}}=100$ ). The data are presented as the means  $\pm$  SDs, the significance of the results was assessed using a two-tailed Student' *t* test). Exact *p* values provided as source data. Source data are provided as a source data file.



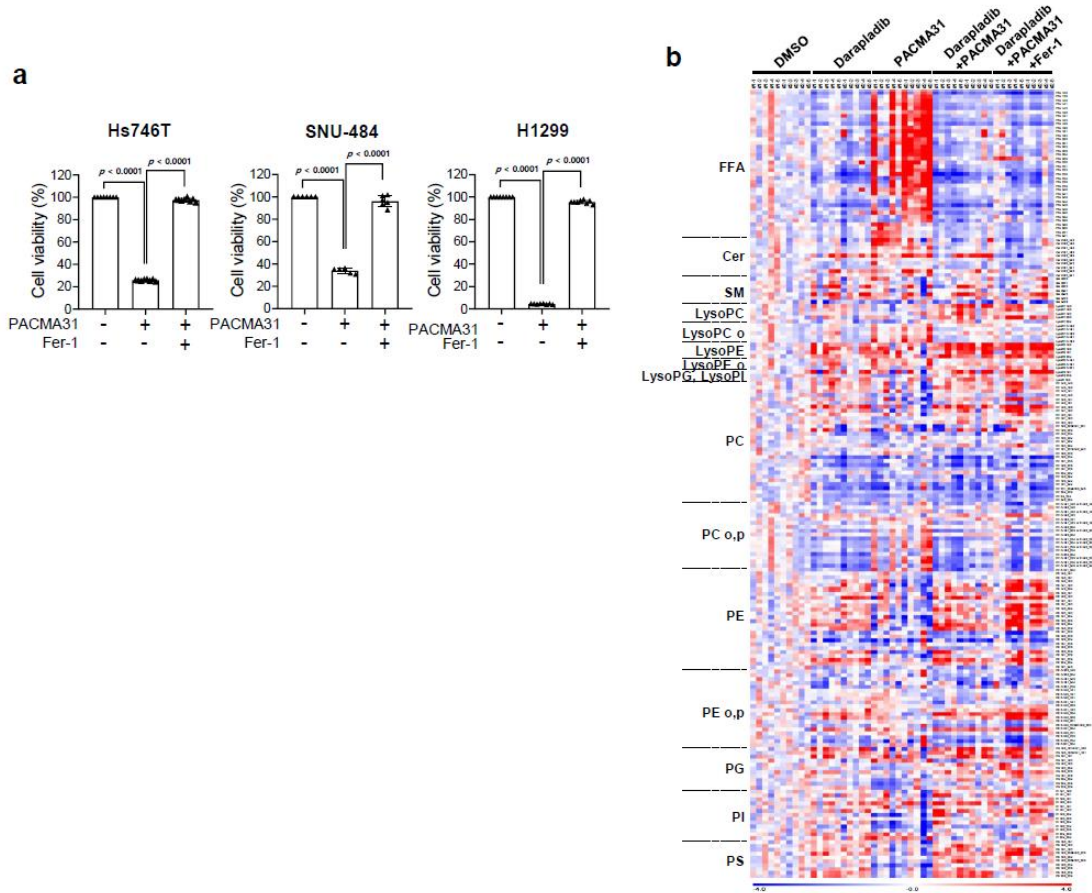

**Supplementary Fig. 14. Darapladib induces the accumulation of PE species in xenografted tumour tissues.**

(a) Relative viability of Hs746T, SNU-484, and H1299 cells treated with PACMA31 in the presence or absence of Fer-1 for 20 h. The data are presented as the means  $\pm$  SDs ( $n = 8$  or 6 independent experiments, the significance of the results was assessed using a two-tailed Student'  $t$  test). (b) Relative lipid composition of tumour tissues treated with darapladib, PACMA31, and ferrostatin-1 determined by UPLC/QTOF-MS as described in the legend of Fig. 7g. Exact  $p$  values provided as source data. Source data are provided as a source data file.

**a**

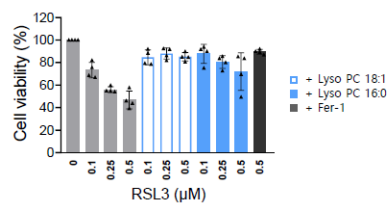

**Supplementary Fig. 15. Supplementation with lysoPC18:0 or lysoPC16:0 abrogates RSL3-induced ferroptosis.**

(A) Relative viability of Hs746T cells pretreated with LysoPC (16:0 or 18:1) for 1 h and treated with RSL3 and/or 2 µM darapladib for 20 h. The data are presented as the means  $\pm$  SDs (n = 4 independent experiments). Source data are provided as a source data file.

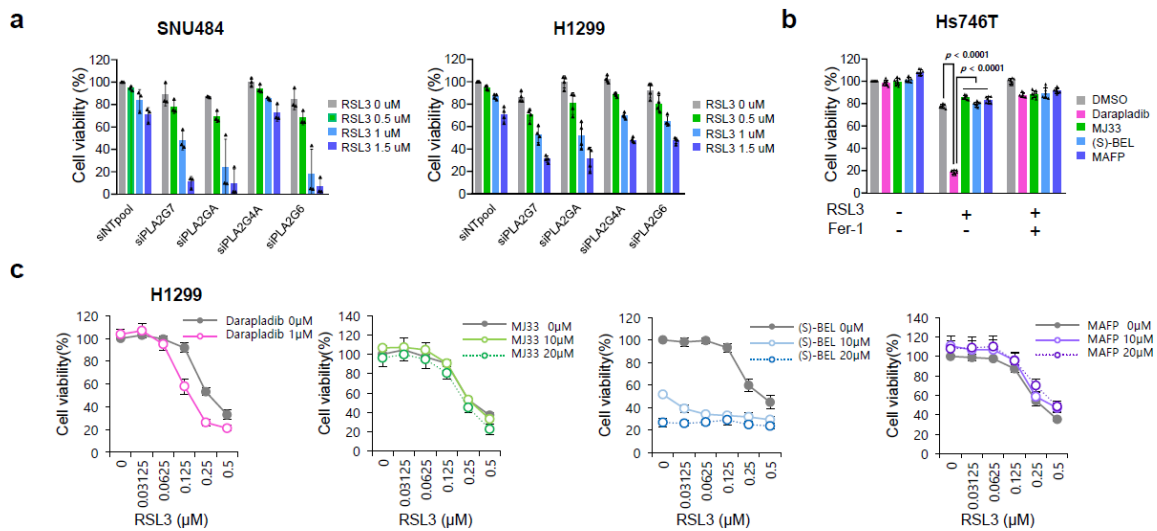

**Supplementary Fig. 16. Effect of PLA2 family members on ferroptosis.**

(a) Relative viability of SNU-484 and H1299 cells transfected with siRNAs against *PLA2G2A* (sPLA2), *PLA2G4A* (cPLA2), *PLA2G6* (iPLA2), and *PLA2G7* (Lp-PLA2) for 72 and then treated with RSL3. The data are presented as the means  $\pm$  SDs (SNU-484 : n = 3, H1299: n = 4, independent experiments). (b, c) Relative viability of Hs746T and H1299 cells treated with various PLA2 inhibitor, such as (S)-BEL (an iPLA2 inhibitor), MAFP (a cPLA2/sPLA2 inhibitor), MJ33 (an inhibitor of PLA2 activity of PRDX6) and/or RSL3, in the presence or absence of Fer-1 for 20 h. The data are presented as the means  $\pm$  SDs (b: n = 8, or c: n = 3 independent experiments, the significance of the results was assessed using a two-tailed Student' *t* test). Exact p values provided as source data. Source data are provided as a source data file.

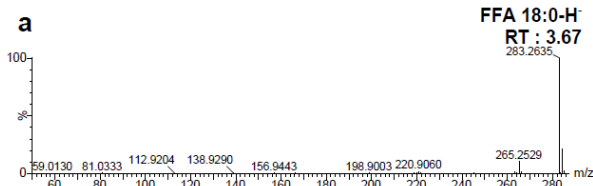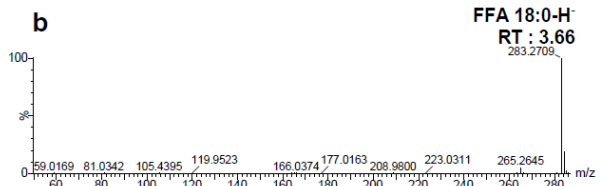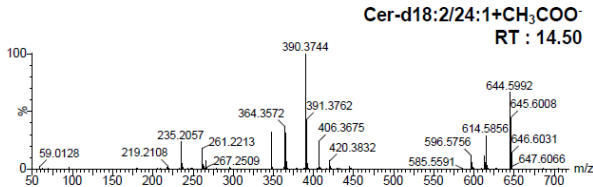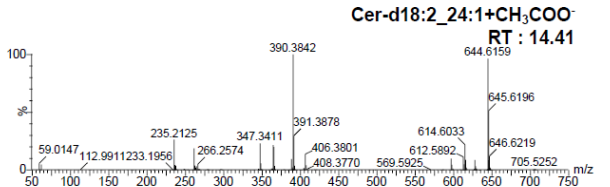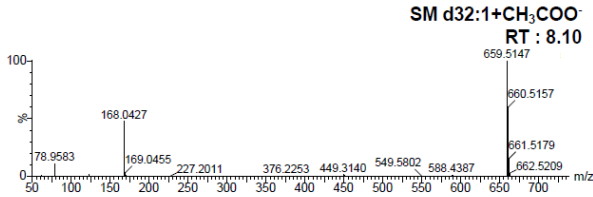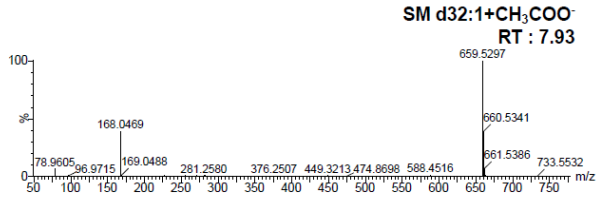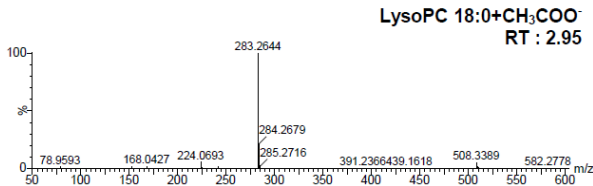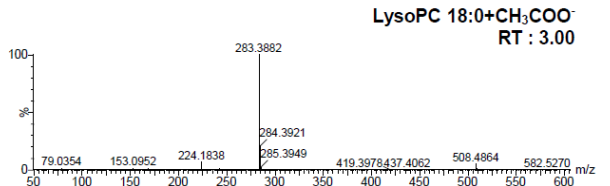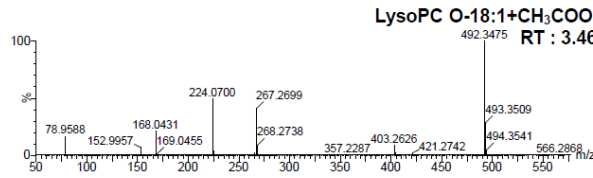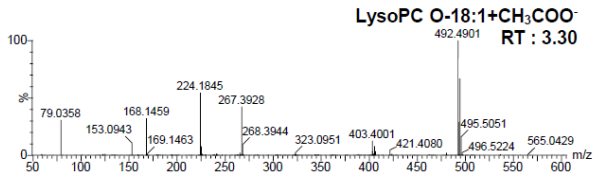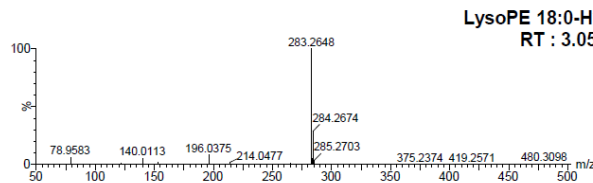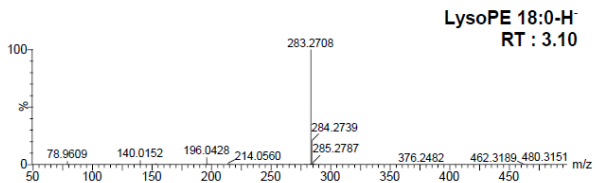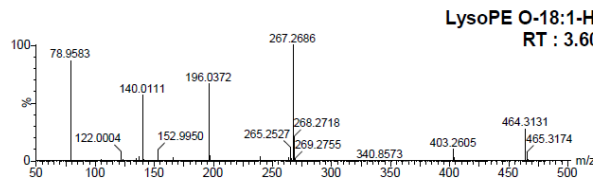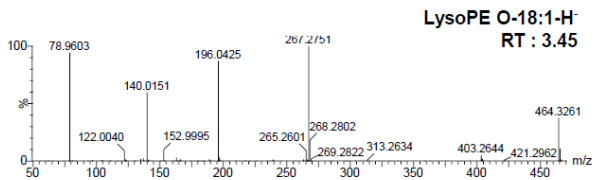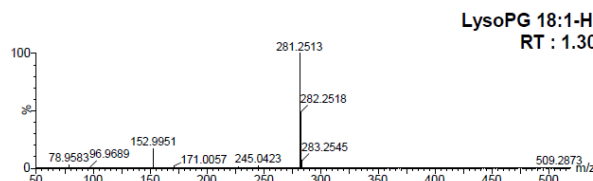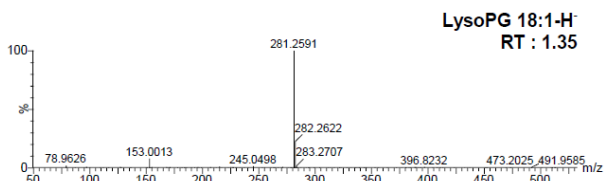

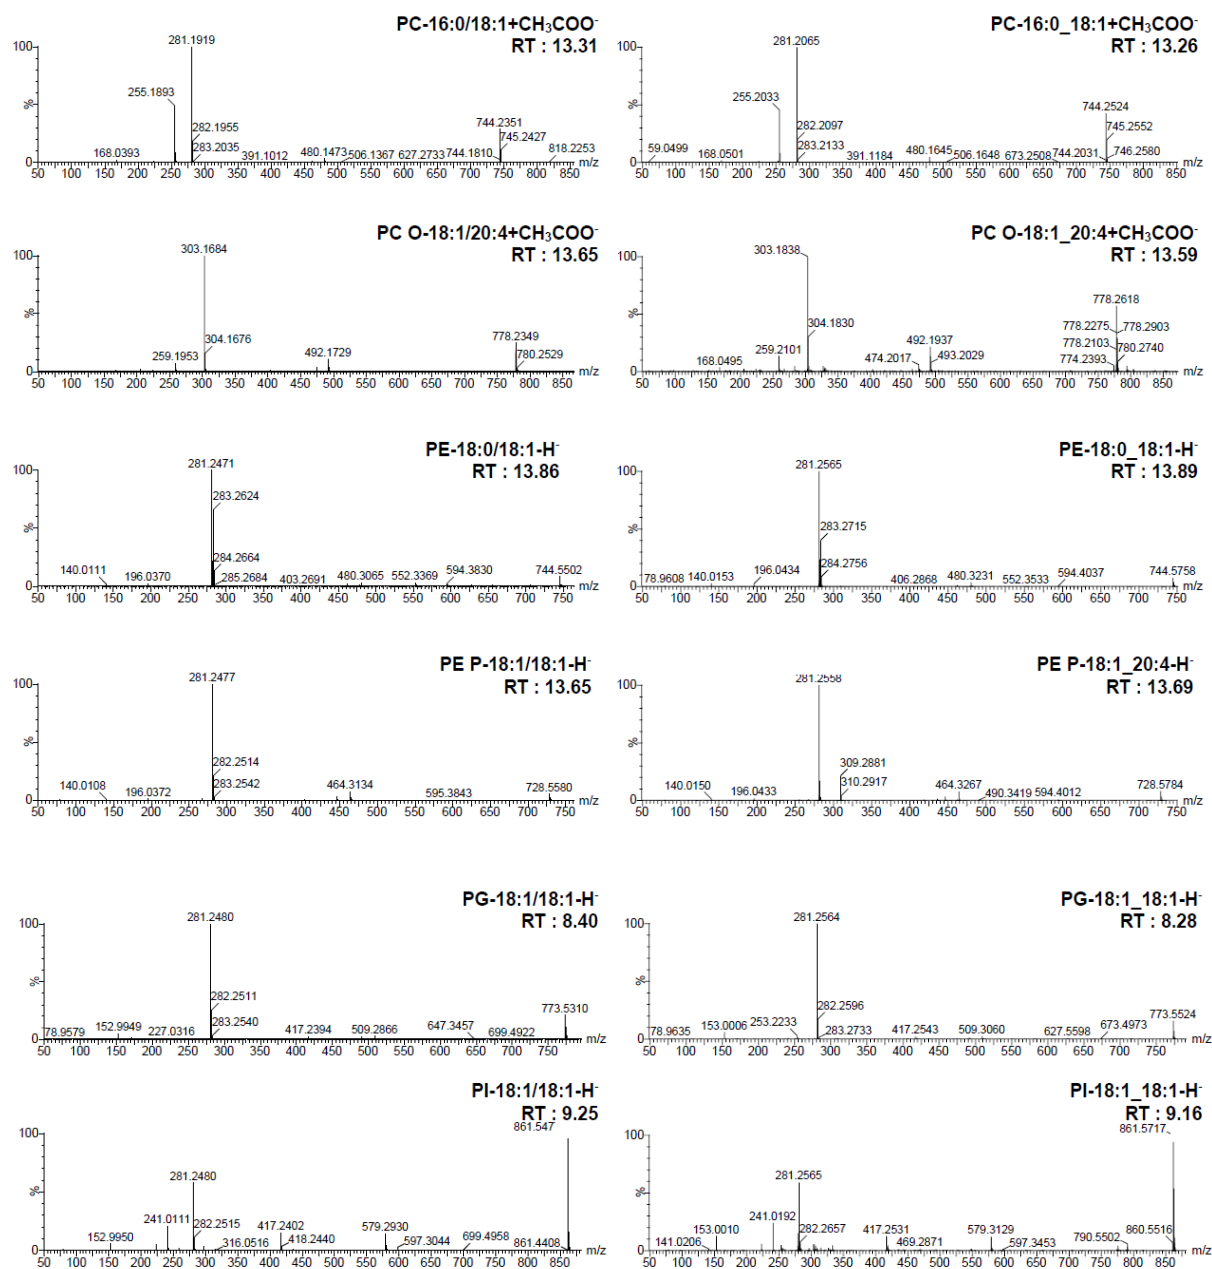

**Supplementary Figure 17. Representative MS/MS spectra of (a) lipid standard compounds and (b) tumour tissues acquired from quality control samples.**

FFA: free fatty acid, Cer: ceramide, SM: sphingomyelin, lysoPC: lysophosphatidylcholine, lysoPE: lysophosphatidylethanolamine, lysoPG: lysophosphatidylglycerol, PC: phosphatidylcholine, PE: phosphatidylethanolamine, PG: phosphatidylglycerol, PI: phosphatidylinositol.

**Supplementary Table 1. MS/MS conditions and retention times of FFA 20:4 and lysoPCs analysed by UPLC-TQ-MS**

| Name           | Polarity | MRM transition (m/z) | Collision energy (eV) | Retention time (min) |
|----------------|----------|----------------------|-----------------------|----------------------|
| FFA 20:4       | Negative | 303.2 > 303.2        | 1                     | 4.92                 |
| LysoPC 16:0    | Negative | 554.3 > 255.3        | 32                    | 5.63                 |
| LysoPC 18:0    | Negative | 582.3 > 283.2        | 32                    | 7.75                 |
| LysoPC 18:1    | Negative | 580.3 > 281.2        | 32                    | 5.89                 |
| FFA 13:0       | Negative | 213.2 > 213.2        | 1                     | 3.58                 |
| LysoPC 18:1-d7 | Negative | 587.4 > 288.2        | 32                    | 5.89                 |

\* FFA: free fatty acid, lysoPC: lysophosphatidylcholine

**Supplementary Table 2. MRM transition, optimal collision energies, calibration curves, regression coefficients, and dynamic ranges of detection and quantification for the analysis of oxidised PE and PE by UPLC-TQ-MS**

| name            | Polarity | MRM transition (m/z)         | Cone voltage (V) | Collision energy (eV) | Retention time (min) | Curve type | Weighting | Calibration curve                                                 | r <sup>2</sup> | Dynamic range (ppb) |
|-----------------|----------|------------------------------|------------------|-----------------------|----------------------|------------|-----------|-------------------------------------------------------------------|----------------|---------------------|
| PE-18:0/20:4+20 | Negative | 798.5 > 283.2, 798.5 > 317.2 | 22               | 36, 24                | 13.75                | Linear     | 1/x       | y=0.1029*x-0.00399065                                             | 0.999095       | 0.2-200             |
| PE-18:0/20:4    | Negative | 766.5 > 283.2, 766.5 > 303.2 | 30               | 40, 30                | 14.72                | 2nd order  | 1/x       | y=-6.79887e <sup>-0.005</sup> *x <sup>2</sup> +0.484119*x+5.60103 | 0.997819       | 60-2400             |
| PE-18:0/22:4    | Negative | 794.5 > 283.2, 794.5 > 331.2 | 30               | 40, 30                | 14.88                |            |           |                                                                   |                |                     |
| PE-15:0/18:1-d7 | Negative | 709.5 > 241.2, 709.5 > 288.2 | 10               | 40, 30                | 14.57                |            |           |                                                                   |                |                     |

\* PE: phosphatidylethanolamine

**Supplementary Table 3. MS/MS conditions for the detection of FFA 20:4-d11 by UPLC-TQ-MS**

| name          | Polarity | MRM transition (m/z) | Cone voltage (V) | Collision energy (eV) | Retention time (min) |
|---------------|----------|----------------------|------------------|-----------------------|----------------------|
| FFA 20:4 m+11 | Negative | 314.2 > 314.2        | 20               | 1                     | 4.53                 |
| FFA 13:0      | Negative | 213.2 > 213.2        | 20               | 1                     | 3.30                 |

\* FFA: free fatty acid



**Supplementary Table 4. Materials and antibodies list used in our study.**

| REAGENT or RESOURCE                                  | SOURCE                    | IDENTIFIER                   |
|------------------------------------------------------|---------------------------|------------------------------|
| <b>Antibodies</b>                                    |                           |                              |
| Rabbit polyclonal Anti-ACC                           | Cell Signaling Technology | 3662; RRID: AB_2219400       |
| Rabbit polyclonal Anti-phospho ACC                   | Cell Signaling Technology | 3661; RRID: AB_330377        |
| Rabbit polyclonal Anti- p70 S6 Kinase                | Cell Signaling Technology | 9202; RRID AB_331676         |
| Rabbit polyclonal Anti-phosphor p70 S6 Kinase        | Cell Signaling Technology | 9205; RRID AB_330944         |
| Rabbit polyclonal Anti-FASN                          | Cell Signaling Technology | 3180; RRID: AB_2100796       |
| Rabbit polyclonal Anti-FTH1                          | Cell Signaling Technology | 3998; RRID: AB_1903974       |
| Rabbit polyclonal Anti-FADS1                         | Proteintech               | 10627-1-AP; RRID: AB_2231403 |
| Rabbit polyclonal Anti-NRF2                          | Proteintech               | 16396-1-AP; RRID: AB_2782956 |
| Mouse monoclonal Anti-PEBP1                          | Santa Cruz Biotechnology  | sc-376925                    |
| Mouse monoclonal Anti-ELOVL5                         | Santa Cruz Biotechnology  | sc-374138; RRID: AB_10920219 |
| Mouse monoclonal Anti-ACSL4                          | Santa Cruz Biotechnology  | Sc-271800; RRID: AB_10715092 |
| Mouse monoclonal Anti-HSP90                          | Santa Cruz Biotechnology  | sc-13119; RRID: AB_675659    |
| Mouse monoclonal Anti-FSP1                           | Santa Cruz Biotechnology  | sc-377120; RRID:AB_2893240   |
| Rabbit polyclonal Anti-GPX4                          | Abcam                     | Ab125066; RRID: AB_10973901  |
| Rabbit polyclonal Anti-Na/K ATPase                   | Abcam                     | Ab76020; RRID:AB_1310695     |
| Rabbit polyclonal Anti-LPCAT3                        | Prosci                    | 16-999                       |
| Mouse monoclonal Anti-SREBP1                         | BD Biosciences            | 557036; RRID: AB_396559      |
| Mouse monoclonal Anti-alpha-Tubulin                  | Sigma-Aldrich             | T9026; RRID: AB_477593       |
| Mouse monoclonal Anti-FALG                           | Sigma-Aldrich             | F3165; RRID: AB_259529       |
| Mouse monoclonal Anti-beta-Actin                     | Sigma-Aldrich             | A5316; RRID: AB_476743       |
| Goat anti Mouse IgG:HRP                              | Biorad                    | 103005; RRID:AB_609692       |
| Goat anti Rabbit IgG:HRP                             | Biorad                    | 403005; RRID:AB_609686       |
| <b>Chemicals, Peptides, and Recombinant Proteins</b> |                           |                              |
| RSL3                                                 | Selleck Chemicals         | S8155; CAS: 1219810-16-8     |
| Ferostatin-1 (Fer-1)                                 | Selleck Chemicals         | S7243; CAS: 347174-05-4      |
| Z-VAD-FMK                                            | Selleck Chemicals         | S7023; CAS: 187389-52-2      |
| Darapladib (SB-480848)                               | Selleck Chemicals         | S7520; CAS: 356057-34-6      |

|                                                           |                     |                                                         |
|-----------------------------------------------------------|---------------------|---------------------------------------------------------|
| Erastin                                                   | Selleck Chemicals   | S7242; CAS:<br>571203-78-6                              |
| ML210                                                     | Sigma-Aldrich       | SML0521; CAS:<br>1360705-96-9                           |
| Liproxstatin-1                                            | Sigma-Aldrich       | SML1414; CAS:<br>950455-15-9                            |
| LDL                                                       | Sigma-Aldrich       | L7914; CAS:<br>308068-14-6                              |
| HDL                                                       | Sigma-Aldrich       | L8039; CAS:<br>308068-14-6                              |
| VLDL                                                      | Sigma-Aldrich       | 437647; CAS:                                            |
| Lipoprotein Deficient Serum from human plasma             | Sigma-Aldrich       | S5519; CAS                                              |
| PACMA31                                                   | Tocris              | 5116; CAS:<br>1401089-31-3                              |
| Necrostatin-1                                             | Enzo Life Sciences  | BML-AP309; CAS:<br>4311-88-0                            |
| MAFP                                                      | Cayman Chemical     | 70660 CAS:<br>188404-10-6                               |
| (S)-BEL (Bromo-enol lactone)                              | Cayman Chemical     | 70700 CAS:<br>88070-98-8                                |
| MJ33 (lithium salt)                                       | Cayman Chemical     | 90001844 CAS:<br>1007476-63-2                           |
| JKE1674                                                   | Cayman Chemical     | 30784 CAS:<br>2421119-60-8                              |
| Oleic acid                                                | Cayman Chemical     | 90260; CAS:<br>112-80-1                                 |
| Arachidonic Acid                                          | Cayman Chemical     | 90010; CAS:<br>506-32-1                                 |
| 1-Stearoyl-2- Arachidonoyl-d11-sn-glycero-3-PE (SAPE-d11) | Cayman Chemical     | 27929; CAS:<br>2750554-96-0                             |
| SPLASH Lipidomix                                          | Avanti Polar Lipids | 330707; CAS:<br>67-56-1                                 |
| Tridecanoic acid                                          | Sigma-Aldrich       | 91988; CAS:<br>638-53-9                                 |
| 1-stearoyl-2-arachidonoyl-sn-glycero-3-PE (PE 18:0_20:4)  | Sigma-Aldrich       | 850804C;CAS:<br>61216-62-4                              |
| Critical Commercial Assays                                |                     |                                                         |
| BODIPY 581/591 C11 (Lipid Peroxidation Sensor)            | Invitrogen          | D3861                                                   |
| CellTiter-Glo 2.0 Cell Viability Assay                    | Promega             | G9243                                                   |
| Cytotoxicity Detection Kit (LDH)                          | Roche               | 11644793001                                             |
| Iron assay kit                                            | Sigma-Aldrich       | MAK025                                                  |
| Deposited Data                                            |                     |                                                         |
| TCGA Pan-Cancer (PANCAN) dataset                          |                     | <a href="http://xena.ucsc.edu">http://xena.ucsc.edu</a> |
| Experimental Models: Cell Lines                           |                     |                                                         |
| Human: Hs 746T                                            | KCLB                | Cat# 30135; RRID:<br>CVCL_0333                          |
| Human: SNU-484                                            | KCLB                | Cat# 00484; RRID:<br>CVCL_0100                          |
| Human: YCC-16                                             | KCLB                | RRID: CVCL_9649                                         |
| Human: H1299                                              | ATCC                | Cat# CRL-5803;<br>RRID: CVCL_0060                       |
| Human: A549                                               | ATCC                | Cat# CCL-185; RRID:<br>CVCL_0023                        |
| Human: HepG2                                              | ATCC                | Cat# HB-8065; RRID:<br>CVCL_0027                        |

|                                           |                   |                                                                                                                                                                                                                          |
|-------------------------------------------|-------------------|--------------------------------------------------------------------------------------------------------------------------------------------------------------------------------------------------------------------------|
| Human:H9c2                                | ATCC              | Cat# CRL-1446;<br>RRID: CVCL_0286                                                                                                                                                                                        |
| Human:HEK293T                             | ATCC              | Cat# CRL-3216;<br>RRID: CVCL_0063                                                                                                                                                                                        |
| Oligonucleotides                          |                   |                                                                                                                                                                                                                          |
| Primers for qPCR, see method section      | This paper        | N/A                                                                                                                                                                                                                      |
| Software and Algorithms                   |                   |                                                                                                                                                                                                                          |
| Prism 8                                   | GraphPad Software | <a href="https://www.graphpad.com/scientific-software/prism/">https://www.graphpad.com/scientific-software/prism/</a> ;<br>RRID: SCR_002798                                                                              |
| Excel                                     |                   |                                                                                                                                                                                                                          |
| PyMOL software (version 1.8)              |                   | <a href="http://www.pymol.org">http://www.pymol.org</a> ;<br>RRID:SCR_000305                                                                                                                                             |
| MarvinView software (version 23.5.0)      |                   | <a href="https://docs.chemaxon.com/display/lts-mercury/compound-registration-history-of-changes.md">https://docs.chemaxon.com/display/lts-mercury/compound-registration-history-of-changes.md</a>                        |
| Modeller software (version 10.4)          |                   | <a href="http://salilab.org/modeller/modeller.html">http://salilab.org/modeller/modeller.html</a> ;<br>RRID:SCR_008395                                                                                                   |
| Chemaxon (version 20.8.5)                 |                   | <a href="https://www.chemaxon.com">https://www.chemaxon.com</a><br>RRID:SCR_004111                                                                                                                                       |
| AutoDock Vina (version 1.2.0)             |                   | <a href="http://vina.scripps.edu">http://vina.scripps.edu</a><br>RRID:SCR_011958                                                                                                                                         |
| Progenesis QI software (version 2.0)      |                   | <a href="http://www.nonlinear.com/progenesis/qi-for-proteomics/">http://www.nonlinear.com/progenesis/qi-for-proteomics/</a><br>RRID:SCR_018923                                                                           |
| MarkerView™ software (version 1.3.1)      |                   | <a href="https://sciex.com/products/software/markerview-software">https://sciex.com/products/software/markerview-software</a>                                                                                            |
| Mass Hunter Workstation (version B.06.00) |                   | <a href="https://www.agilent.com/en/support/software-informatics/qual-b-0600-sp1">https://www.agilent.com/en/support/software-informatics/qual-b-0600-sp1</a>                                                            |
| BD CellQuest Pro (version 5. 1)           |                   | <a href="https://www.bdbiosciences.com/documents/15_cellquest_prosoft_analysis.pdf">https://www.bdbiosciences.com/documents/15_cellquest_prosoft_analysis.pdf</a><br>RRID:SCR_014489                                     |
| MassLynx (version 4.2)                    |                   | <a href="http://www.waters.com/waters/en_US/MassLynx-MS-Software/nav.htm?cid=513662&amp;locale=en_US">http://www.waters.com/waters/en_US/MassLynx-MS-Software/nav.htm?cid=513662&amp;locale=en_US</a><br>RRID:SCR_014271 |
| Other                                     |                   |                                                                                                                                                                                                                          |
| DMEM                                      | Hyclone           | Cat# SH30243.01                                                                                                                                                                                                          |
| MEM                                       | Hyclone           | Cat# SH30024.01                                                                                                                                                                                                          |
| RPMI1640                                  | Corning           | Cat# 10-040-CVRC                                                                                                                                                                                                         |

|                                             |           |                |
|---------------------------------------------|-----------|----------------|
| DMEM                                        | Gibco     | Cat# 21013024  |
| L-Glutamine                                 | Gibco     | Cat# 25030-081 |
| Fetal bovine serum                          | Gibco     | Cat# 10099-141 |
| Fetal bovine serum, dialyzed                | Gibco     | Cat# 26400-044 |
| Antibiotic-Antimycotic, 100X                | Gibco     | Cat# 15240-062 |
| Puromycin Dihydrochloride                   | Gibco     | Cat# A1113803  |
| Propidium Iodide                            | Invtrogen | Cat# P1304MP   |
| Lipofectamine™ RNAiMAX transfection reagent | Invtrogen | Cat# 13778075  |
| Lipofectamine™ 3000 Transfection Reagent    | Invtrogen | Cat# L3000075  |

Supplementary Figure. 4 a (uncropped scans)

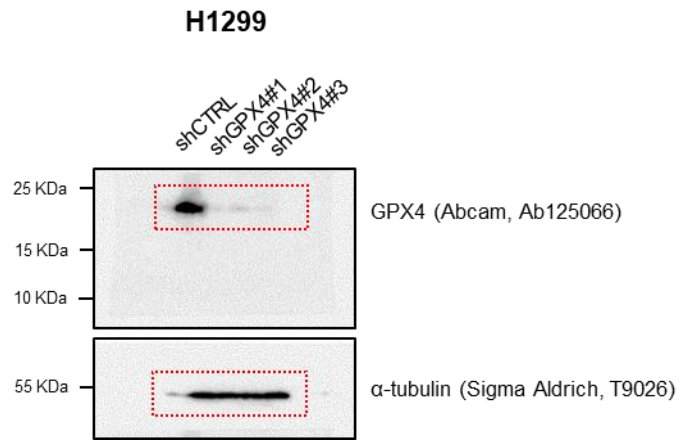

Supplementary Figure. 5 a (uncropped scans)

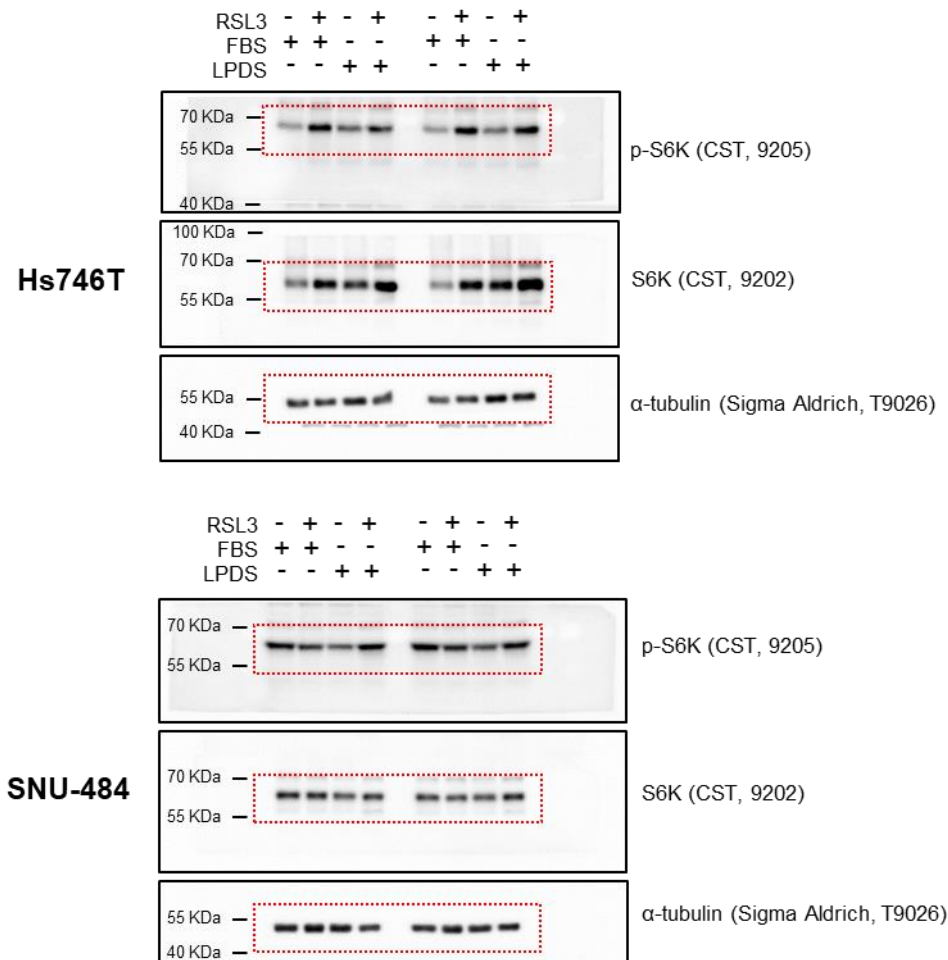

16hr incubation with FBS or LPDS  
1hr RSL3 treatment

Supplementary Figure. 8 1 (uncropped scans)

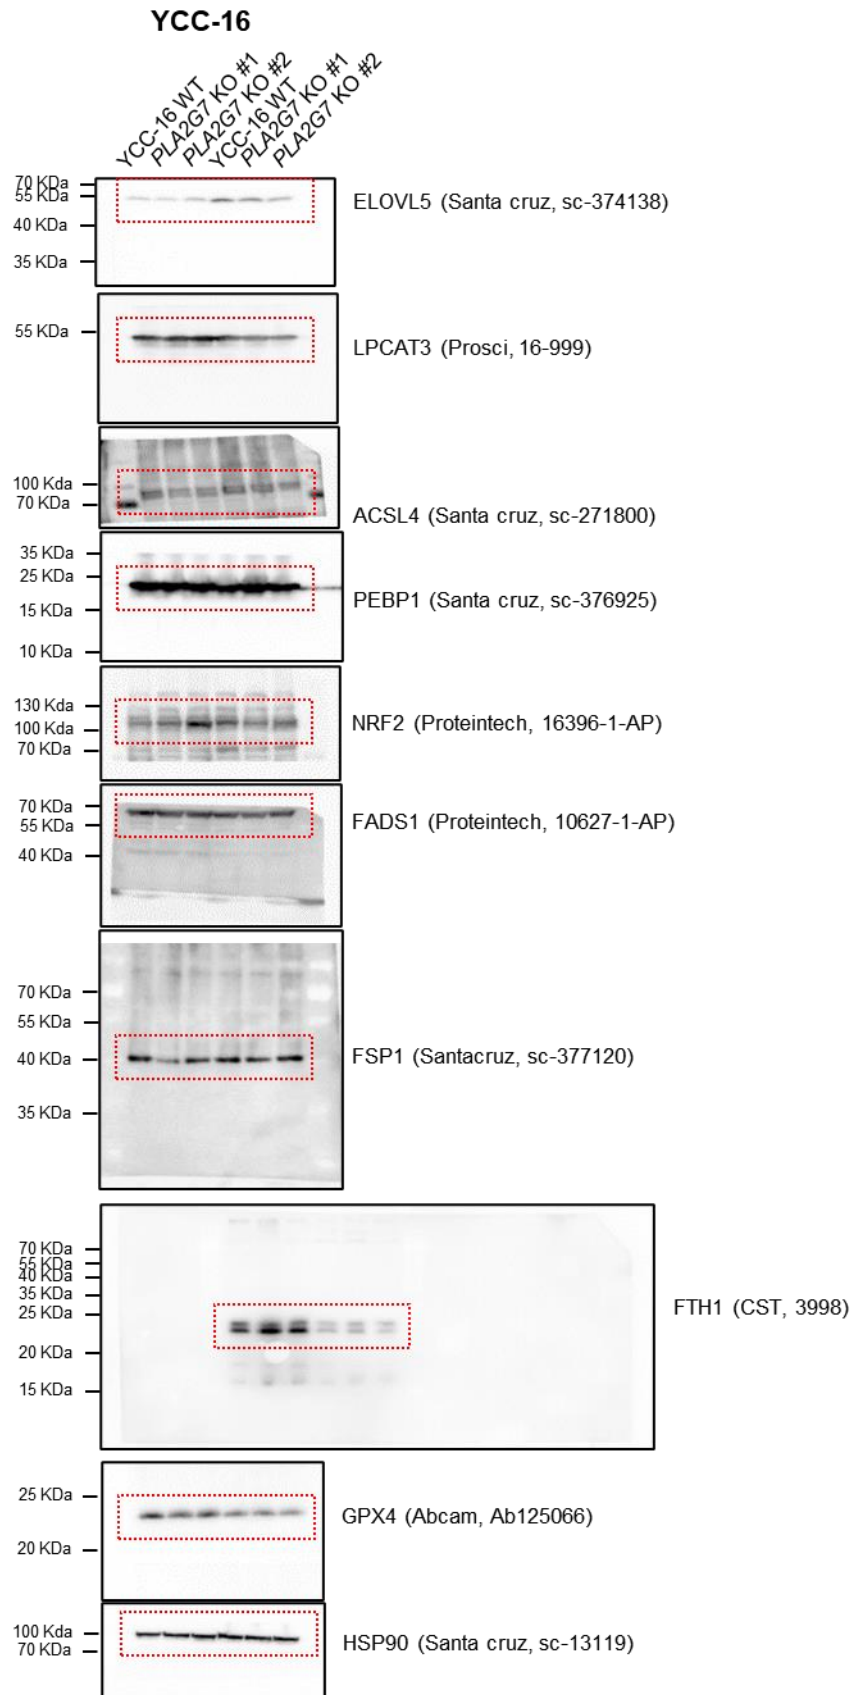

# H1299

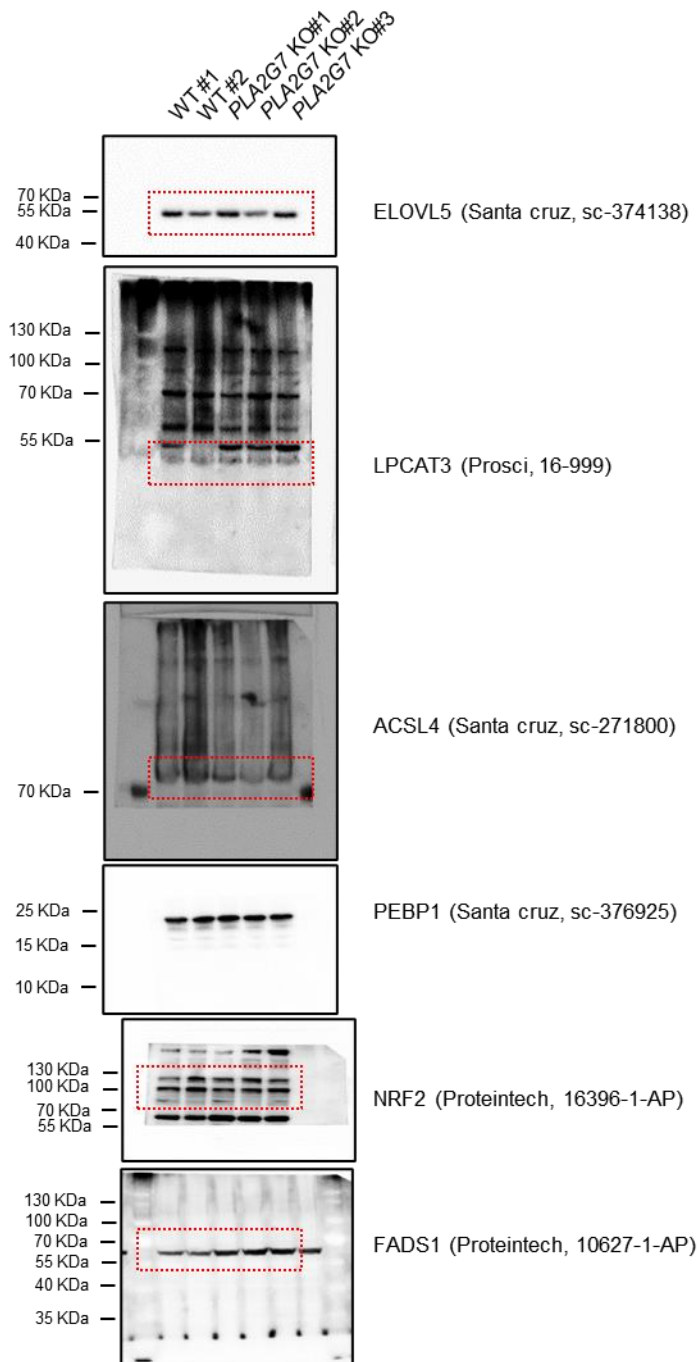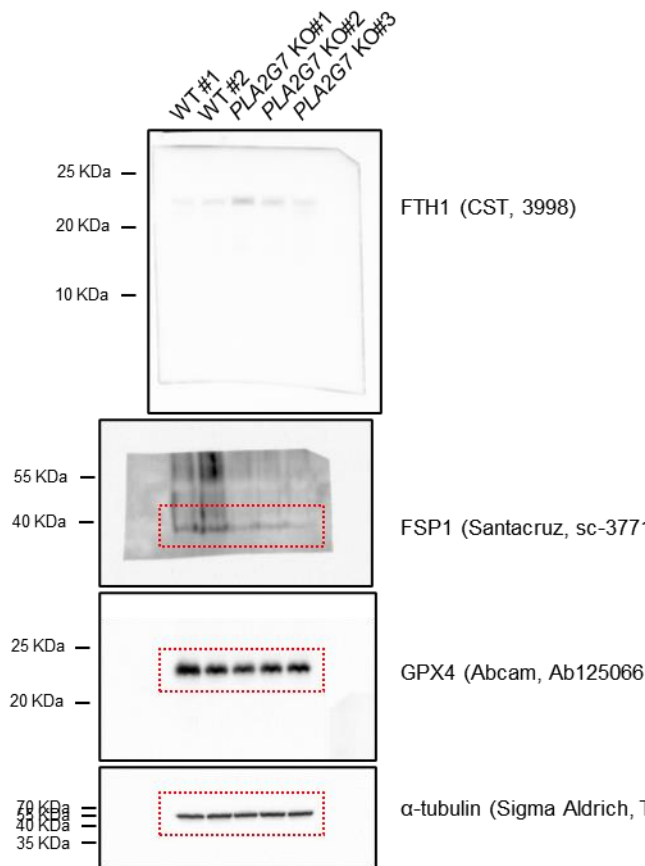



Supplementary Figure. 10 d (uncropped scans)

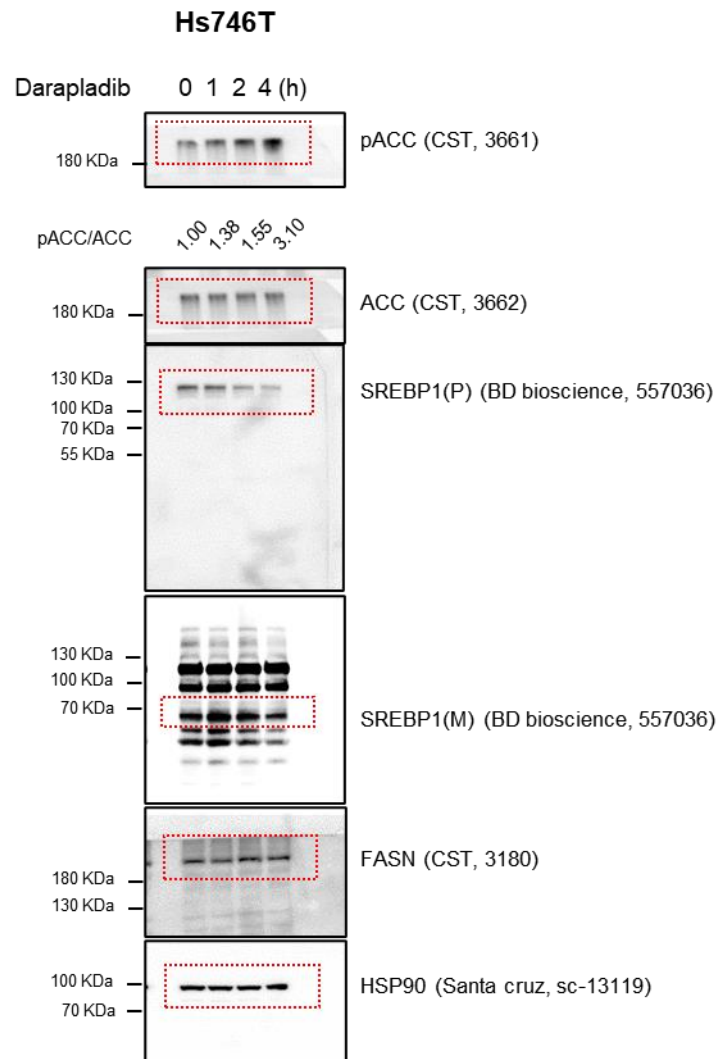

Supplement: 41467_2023_41462_MOESM11_ESM.pdf [file 41467_2023_41462_MOESM11_ESM.pdf]
